# Supplementary material for: Treatment of Sewage Sludge Compost Leachates on a Green Waste Biopile: A Case Study for an On-Site Application
Source: MDPI journal article supplement (doi:10.3390/pr10061196), 2022-06-15
Supplement: s1 [file s1]

## Supplementary Materials

**Table S1.** Watering schedule and sampling campaigns during the trial – the numbers represent the number of weeks and roman numerals represent watering events and \* means after watering

| Sampling campaigns  |          |              |              |               |
|---------------------|----------|--------------|--------------|---------------|
| Before first supply | Watering | After supply | After 1 week | After 2 weeks |
| 0                   | I        | 0*           | 1            | 2             |
|                     | II       | 2*           | 3            | 4             |
|                     | III      | 4*           | 5            | 6             |
|                     | IV       | 6*           | 7            | 8             |

**Table S2.** Physico-chemical data ( $\pm$  CI, n =3) of water extracts (WE) of the test biopile substrate. CI: Confidence Interval; Mean, SD (standard deviation), Min and Max correspond to the values measured during the trial for each parameter (n=12, excepted VFAs and before supply); \*: LOQ (Limit of quantification)

| Sampling campaigns         | Watering | <i>pH</i><br>- | <i>Conductivity</i><br><i>mS cm<sup>-1</sup></i> | <i>DOC</i><br><i>mg g<sup>-1</sup> DW</i> | <i>NO<sub>3</sub><sup>-</sup></i><br><i>mgN g<sup>-1</sup> DW</i> | <i>NH<sub>4</sub><sup>+</sup></i><br><i>mgN g<sup>-1</sup> DW</i> | <i>TDN</i><br><i>mgN g<sup>-1</sup> DW</i> | <i>PO<sub>4</sub><sup>3-</sup></i><br><i>mgP<sub>2</sub>O<sub>5</sub> g<sup>-1</sup> DW</i> | <i>VFAs</i><br><i>mg g<sup>-1</sup> DW</i> | <i>SUVA<sub>254</sub></i><br><i>L mgC<sup>-1</sup> m<sup>-1</sup></i> | <i>E<sub>2</sub>/E<sub>3</sub></i><br>- |
|----------------------------|----------|----------------|--------------------------------------------------|-------------------------------------------|-------------------------------------------------------------------|-------------------------------------------------------------------|--------------------------------------------|---------------------------------------------------------------------------------------------|--------------------------------------------|-----------------------------------------------------------------------|-----------------------------------------|
| Before supply              |          | 7.7 $\pm$ 0.26 | 2 $\pm$ 0.2                                      | 15.00 $\pm$ 12.62                         | 0.027 $\pm$ 0.032                                                 | 0.32 $\pm$ 0.16                                                   | 1.34 $\pm$ 0.75                            | 0.107 $\pm$ 0.050                                                                           | < 0.4*                                     | 1.41 $\pm$ 0.70                                                       | 4.71 $\pm$ 0.11                         |
| Supply                     | I        | 7.9 $\pm$ 0.21 | 3 $\pm$ 0.3                                      | 7.77 $\pm$ 1.38                           | 0.003 $\pm$ 0.002                                                 | 3.62 $\pm$ 1.30                                                   | 4.02 $\pm$ 1.78                            | 0.052 $\pm$ 0.034                                                                           | < 0.4*                                     | 3.55 $\pm$ 0.56                                                       | 3.28 $\pm$ 0.76                         |
|                            | II       | 7.9 $\pm$ 0.16 | 4 $\pm$ 0.4                                      | 7.52 $\pm$ 1.09                           | 0.071 $\pm$ 0.031                                                 | 8.73 $\pm$ 4.38                                                   | 10.08 $\pm$ 4.48                           | 0.092 $\pm$ 0.018                                                                           | < 0.4*                                     | 1.89 $\pm$ 0.12                                                       | 4.53 $\pm$ 0.56                         |
|                            | III      | 8.0 $\pm$ 0.04 | 4 $\pm$ 1.0                                      | 6.02 $\pm$ 0.76                           | 0.159 $\pm$ 0.004                                                 | 9.25 $\pm$ 5.92                                                   | 10.55 $\pm$ 6.18                           | 0.171 $\pm$ 0.002                                                                           | < 0.4*                                     | 1.84 $\pm$ 0.14                                                       | 4.35 $\pm$ 0.46                         |
|                            | IV       | 7.9 $\pm$ 0.09 | 5 $\pm$ 0.8                                      | 5.95 $\pm$ 1.36                           | 0.101 $\pm$ 0.130                                                 | 10.34 $\pm$ 5.42                                                  | 13.18 $\pm$ 5.88                           | 0.106 $\pm$ 0.017                                                                           | < 0.4*                                     | 1.98 $\pm$ 0.25                                                       | 4.22 $\pm$ 0.38                         |
| Abatement after<br>1 week  | I        | 7.7 $\pm$ 0.10 | 3 $\pm$ 0.1                                      | 8.97 $\pm$ 2.93                           | 0.006 $\pm$ 0.003                                                 | 4.09 $\pm$ 2.09                                                   | 4.99 $\pm$ 2.24                            | 0.129 $\pm$ 0.020                                                                           | < 0.4*                                     | 2.07 $\pm$ 0.25                                                       | 4.67 $\pm$ 0.30                         |
|                            | II       | 7.6 $\pm$ 0.14 | 3 $\pm$ 0.5                                      | 5.71 $\pm$ 0.89                           | 0.013 $\pm$ 0.010                                                 | 5.33 $\pm$ 1.30                                                   | 6.57 $\pm$ 1.44                            | 0.143 $\pm$ 0.052                                                                           | < 0.4*                                     | 2.10 $\pm$ 0.44                                                       | 4.58 $\pm$ 0.41                         |
|                            | III      | 7.9 $\pm$ 0.12 | 4 $\pm$ 1.3                                      | 4.97 $\pm$ 1.16                           | 0.123 $\pm$ 0.065                                                 | 7.43 $\pm$ 5.94                                                   | 8.41 $\pm$ 6.01                            | 0.121 $\pm$ 0.072                                                                           | < 0.4*                                     | 1.89 $\pm$ 0.30                                                       | 4.61 $\pm$ 0.52                         |
|                            | IV       | 7.8 $\pm$ 0.26 | 5 $\pm$ 0.9                                      | 4.75 $\pm$ 0.35                           | 0.055 $\pm$ 0.058                                                 | 8.80 $\pm$ 3.90                                                   | 12.43 $\pm$ 2.08                           | 0.199 $\pm$ 0.063                                                                           | < 0.4*                                     | 2.32 $\pm$ 0.74                                                       | 4.63 $\pm$ 0.46                         |
| Abatement after<br>2 weeks | I        | 7.8 $\pm$ 0.28 | 3 $\pm$ 0.8                                      | 9.00 $\pm$ 3.21                           | 0.015 $\pm$ 0.015                                                 | 3.10 $\pm$ 2.82                                                   | 4.12 $\pm$ 3.27                            | 0.114 $\pm$ 0.011                                                                           | < 0.4*                                     | 1.62 $\pm$ 0.51                                                       | 5.11 $\pm$ 0.37                         |
|                            | II       | 7.6 $\pm$ 0.44 | 3 $\pm$ 0.8                                      | 9.33 $\pm$ 5.80                           | 0.015 $\pm$ 0.012                                                 | 4.09 $\pm$ 2.37                                                   | 5.08 $\pm$ 2.56                            | 0.082 $\pm$ 0.004                                                                           | 9.2                                        | 1.87 $\pm$ 0.74                                                       | 5.17 $\pm$ 0.56                         |
|                            | III      | 7.9 $\pm$ 0.03 | 3 $\pm$ 0.9                                      | 5.55 $\pm$ 1.49                           | 0.082 $\pm$ 0.104                                                 | 4.84 $\pm$ 4.88                                                   | 6.27 $\pm$ 5.24                            | 0.085 $\pm$ 0.041                                                                           | < 0.4*                                     | 2.20 $\pm$ 0.14                                                       | 4.68 $\pm$ 0.37                         |
|                            | IV       | 7.9 $\pm$ 0.15 | 4 $\pm$ 1.3                                      | 8.85 $\pm$ 9.68                           | 0.080 $\pm$ 0.110                                                 | 6.30 $\pm$ 6.07                                                   | 9.54 $\pm$ 2.84                            | 0.083 $\pm$ 0.021                                                                           | 1.5                                        | 2.55 $\pm$ 2.28                                                       | 4.47 $\pm$ 0.48                         |
| Mean                       |          | 7.8            | 3.6                                              | 7.03                                      | 0.061                                                             | 6.33                                                              | 7.94                                       | 0.115                                                                                       | -                                          | 2.16                                                                  | 4.53                                    |
| SD                         |          | 0.1            | 0.7                                              | 1.72                                      | 0.051                                                             | 2.50                                                              | 3.21                                       | 0.041                                                                                       | -                                          | 0.50                                                                  | 0.48                                    |
| MIN                        |          | 7.6            | 3                                                | 4.75                                      | 0.003                                                             | 3.10                                                              | 4.02                                       | 0.052                                                                                       | <0.4*                                      | 1.62                                                                  | 3.28                                    |
| MAX                        |          | 8.0            | 5                                                | 9.33                                      | 0.159                                                             | 10.34                                                             | 13.18                                      | 0.199                                                                                       | 9.2                                        | 3.55                                                                  | 5.17                                    |

**Table S3.** Physico-chemical data ( $\pm$  CI, n =3) of solid samples of the biopile substrate. CI: Confidence Interval; Mean, SD (standard deviation), Min and Max correspond to the values measured during the trial for each parameter (n=12, excepted TP and TMEs) except before supply;

| Sampling campaigns         | Watering | TC               | TN                | TC/TN       | $\delta^{15}N$ | TP                     | As            | Cd            | TMEs ( $mg\ kg^{-1}\ DW$ ) |                 |                |                |                  | DW          |
|----------------------------|----------|------------------|-------------------|-------------|----------------|------------------------|---------------|---------------|----------------------------|-----------------|----------------|----------------|------------------|-------------|
|                            |          | $mg\ g^{-1}\ DW$ | $mgN\ g^{-1}\ DW$ | -           | ‰              | $mgP_2O_5\ g^{-1}\ DW$ |               |               | Cr                         | Cu              | Ni             | Pb             | Zn               | % RW        |
| Before supply              |          | 324 $\pm$ 38     | 24 $\pm$ 3        | 13 $\pm$ 13 | 6.7 $\pm$ 0.9  | 8.2 $\pm$ 1.6          | 1.1 $\pm$ 0.4 | 0.3 $\pm$ 0.1 | 17.9 $\pm$ 4.7             | 44.0 $\pm$ 9.3  | 9.7 $\pm$ 2.4  | 19.1 $\pm$ 4.0 | 120.7 $\pm$ 25.1 | 69 $\pm$ 11 |
| Supply                     | I        | 317 $\pm$ 7      | 25 $\pm$ 2        | 13 $\pm$ 4  | 7.3 $\pm$ 1.1  | 8.0 $\pm$ 1.9          | 1.3 $\pm$ 0.4 | 0.2 $\pm$ 0.1 | 25.5 $\pm$ 16.4            | 45.1 $\pm$ 18.1 | 9.7 $\pm$ 1.3  | 16.6 $\pm$ 3.8 | 118.6 $\pm$ 26.6 | 62 $\pm$ 1  |
|                            | II       | 330 $\pm$ 41     | 32 $\pm$ 8        | 10 $\pm$ 5  | 7.4 $\pm$ 0.1  |                        |               |               |                            |                 |                |                |                  | 48 $\pm$ 9  |
|                            | III      | 334 $\pm$ 16     | 25 $\pm$ 3        | 14 $\pm$ 4  | 6.7 $\pm$ 0.5  |                        |               |               |                            |                 |                |                |                  | 45 $\pm$ 11 |
|                            | IV       | 318 $\pm$ 12     | 27 $\pm$ 4        | 12 $\pm$ 3  | 7.1 $\pm$ 0.4  |                        |               |               |                            |                 |                |                |                  | 42 $\pm$ 6  |
| Abatement<br>1 week after  | I        | 323 $\pm$ 18     | 28 $\pm$ 1        | 12 $\pm$ 18 | 6.8 $\pm$ 0.4  | Not analyzed           |               |               |                            |                 |                |                |                  | 58 $\pm$ 10 |
|                            | II       | 325 $\pm$ 16     | 22 $\pm$ 1        | 15 $\pm$ 24 | 6.7 $\pm$ 0.9  |                        |               |               |                            |                 |                |                |                  | 47 $\pm$ 1  |
|                            | III      | 334 $\pm$ 33     | 24 $\pm$ 6        | 14 $\pm$ 5  | 5.9 $\pm$ 0.4  |                        |               |               |                            |                 |                |                |                  | 51 $\pm$ 17 |
|                            | IV       | 317 $\pm$ 7      | 23 $\pm$ 4        | 14 $\pm$ 2  | 6.8 $\pm$ 1.1  |                        |               |               |                            |                 |                |                |                  | 45 $\pm$ 3  |
| Abatement<br>2 weeks after | I        | 324 $\pm$ 14     | 27 $\pm$ 3        | 12 $\pm$ 4  | 6.0 $\pm$ 0.7  |                        |               |               |                            |                 |                |                |                  | 61 $\pm$ 18 |
|                            | II       | 342 $\pm$ 9      | 21 $\pm$ 1        | 16 $\pm$ 12 | 6.1 $\pm$ 0.8  |                        |               |               |                            |                 |                |                |                  | 50 $\pm$ 4  |
|                            | III      | 332 $\pm$ 9      | 23 $\pm$ 4        | 14 $\pm$ 2  | 5.2 $\pm$ 0.8  |                        |               |               |                            |                 |                |                |                  | 48 $\pm$ 8  |
|                            | IV       | 345 $\pm$ 12     | 24 $\pm$ 4        | 15 $\pm$ 3  | 5.2 $\pm$ 0.5  | 9.0 $\pm$ 0.6          | 1.5 $\pm$ 0.5 | 0.3 $\pm$ 0.1 | 16.9 $\pm$ 3.0             | 49.6 $\pm$ 5.2  | 10.0 $\pm$ 1.2 | 23.1 $\pm$ 7.3 | 133.2 $\pm$ 7.2  | 47 $\pm$ 8  |
| Mean                       |          | 328              | 25                | 13          | 6.5            | 8.4                    | 1.3           | 0.3           | 20                         | 46              | 9.8            | 20             | 124              | 52          |
| SD                         |          | 9.12             | 2.93              | 1.56        | 0.7            | 0.6                    | 0.2           | 0.05          | 4.7                        | 3.0             | 0.2            | 3.3            | 7.9              | 8.0         |
| MIN                        |          | 317              | 21                | 10          | 5.2            | 8.0                    | 1.1           | 0.2           | 16.9                       | 44.0            | 9.7            | 16.6           | 119              | 42          |
| MAX                        |          | 345              | 32                | 16          | 7.4            | 9.0                    | 1.6           | 0.3           | 25.5                       | 49.6            | 10.0           | 23.1           | 133              | 62          |

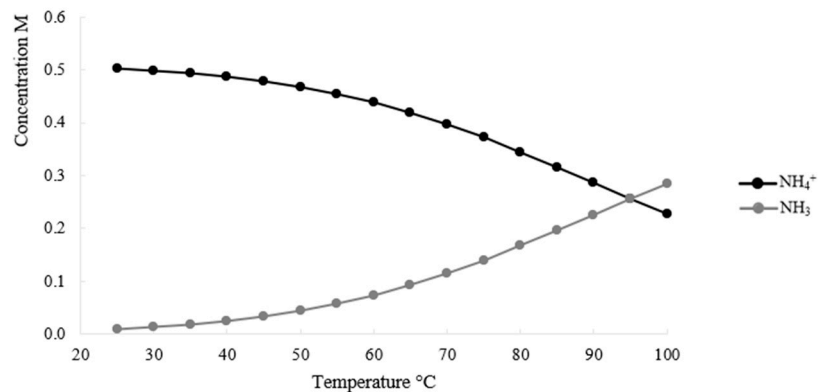

**Figure S1.** Speciation of dissolved  $\text{NH}_4^+$  (0.5 M) as a function of Temperature, calculated using PHREEQC (USGS), Version 3.7 with database Phreeqc.dat.

**Table S4.** Persistent organic pollutants (Mean  $\pm$  CI, n = 5) of solid samples of the biopile substrate. CI: Confidence Interval; \*: LOD (Limit of detection); \*\*: LOQ (Limit of quantification)

| Compound                      | Before first supply | After 8 weeks  |
|-------------------------------|---------------------|----------------|
| PCB ( $\mu\text{g.kg}^{-1}$ ) |                     |                |
| PCB 28                        | < 2.45*             | < 2.45*        |
| PCB 52                        | < 2.85*             | < 2.85*        |
| PCB 101                       | < 4.19*             | < 4.19*        |
| PCB 118                       | < 5.45*             | < 5.45*        |
| PCB 138                       | < 9.71*             | < 9.71*        |
| PCB 153                       | < 8.09*             | < 8.09*        |
| PCB 180                       | < 19.11*            | < 19.11*       |
| HAP ( $\mu\text{g.kg}^{-1}$ ) |                     |                |
| Fluoranthene                  | 107 $\pm$ 32        | 92 $\pm$ 14    |
| Benzo(b,k)fluoranthene        | 27 $\pm$ 3          | 27 $\pm$ 0.3   |
| Benzo(a)pyrene                | < 39**              | < 39**         |
| $\Sigma$ 3HAP                 | 134 $\pm$ 35        | 119 $\pm$ 14.3 |
| *: LOD; **: LOQ               |                     |                |
